# Supplementary material for: Effectiveness of Non-Pharmacological Interventions to Prevent Falls in Older People: A Systematic Overview. The SENATOR Project ONTOP Series
Source: PLoS One. 2016 Aug 25;11(8):e0161579. doi: 10.1371/journal.pone.0161579 (PMC4999091; doi:10.1371/journal.pone.0161579)
Supplement: S4 Table — (XLSX) [file pone.0161579.s005.xlsx]

## Sheet: Interventions
		EXERCISES	SURGERY		MUI	FNT	PSYCHOLOGICAL	ENVIRONMENT							SOCIAL ENVIRONMENT		KNOWLEDGE	OTHER
Study ID	AMSTAR	Exercises	Cataract surgery	Pacemaker	Management of urinary incontinence	Fluid/nutrition therapy	Psychological	Environmental modification	Low beds	Assistive and protective aids	ID bracelets	Vision assessment/correction	Bed alarm	Footwear	Social environment	Staff education	Patient education	Physical therapy/rehabilitation	Cardiac pacing	Postural hypotension treatment
Al-Aama 2011	0	x	x					x				x		x					x	x
Allen 2011	8	x
Anderson 2011	10								x				x
Anderson 2012	9								x				x
Batchelor 2010	5	x						x							x		x	x
Batchelor 2013	6	x			x	x
Bunn 2014	6	x			x	x		x		x		x			x	x	x
Burton 2015	6	x						x		x		x		x
Cadore 2013	4	x
Cameron 2010	8	x			x	x	x	x		x					x	x	x
Cameron 2012	8	x			x	x		x		x					x	x	x
Chan 2015	6	x
Choi 2011	4	x						x	x	x	x		x	x		x	x
Choi 2012	7	x						x		x		x
Combes 2013	5									x
Corrieri 2011	1	x						x				x					x
de Kam 2009	4	x
Desapriya 2010	7		x
DiBardino 2012	6	x								x			x				x
El-Khoury 2013	5	x
Fox 2012	7									x								x
Gillespie 2010	10									x
Gillespie 2012	10	x	x	x		x	x	x		x		x		x		x	x
Gleeson 2014	6	x						x
Goodwin 2014	8	x			x	x	x	x		x		x					x
Gregory 2009	4	x
Gschwind 2011	6	x						x		x				x
Guo 2014	1	x	x	x				x				x					x
Hempel 2013	4								x		x		x	x	x	x	x
Ishigaki 2014	6	x
Ishikawa 2013	5		x
Kosse 2013	4	x						x								x	x
Laguna-Parras 2010	3	x						x
Lam 2012	5	x
Lee 2014	6	x						x	x	x		x		x	x	x	x
Leung 2011	4	x
Logghe 2010	6	x
Low 2009	5	x
Martin 2013	3	x
McMahon 2012	3	x
Miake-Lye 2013	2	x						x		x				x		x	x
Michael 2010	6	x				x	x	x		x		x				x	x	x		x
Neyens 2011	4	x						x		x						x	x	x
Petridou 2009	4	x						x							x		x	x
Santesso 2014	10									x
Schleicher 2012	2	x
Schoene 2014	5	x															x
Sherrington 2011	5	x
Silva 2013	5	x						x		x		x				x
Simek 2012	4	x						x						x			x
Simpson 2013	1	x						x		x		x		x		x	x	x		x
Sitjà-Rabert 2012	5	x
Thomas 2010	6	x
Verheyden 2013	9	x										x
Vlaeyen 2015	8	x			x	x		x		x		x		x		x	x			x
Voigt-Radloff 2013	5	x						x		x							x
Wallis 2011	0	x	x			x		x		x						x
Winter 2013	5	x					x	x		x							x
Wooton 2010	2	x
